# Supplementary material
Source: PubMed Central journal article supplement (PMC9986825)
Supplement: EMBR-24-e56034-s009.pdf [file EMBR-24-e56034-s009.pdf]

Table EV 1

| Genes(mouse)                      | Forward sequence (5' to 3') | Reverse sequence (5' to 3') |
|-----------------------------------|-----------------------------|-----------------------------|
| <i>IL-22</i>                      | CATGCAGGAGGTGGTACCTT        | CAGACGCAAGCATTCTCAG         |
| <i>RegIII <math>\gamma</math></i> | TCAGGTGCAAGGTGAAGTTG        | GGCCACTGTTACCACTGCTT        |
| <i>RegIII <math>\beta</math></i>  | CTCTCCTGCCTGATGCTCTT        | GTAGGAGCCATAAGCCTGGG        |
| <i>Muc1</i>                       | TGTCTGTTGGGGTCTCCTTC        | AAAAGTACCCTCCCGGAAAA        |
| <i>IL-17a</i>                     | TGTGAAGGTCAACCTCAAAGTC      | AGGGATATCTATCAGGGTCTTCATT   |
| <i>IFN-<math>\gamma</math></i>    | TCAGCAACAGCAAGGCGAAA        | GAATGCTTGGCGCTGGACCT        |
| <i>IL-1<math>\beta</math></i>     | ATCTCGCAGCAGCACATCAA        | ATGGGAACGTCACACACCAG        |
| <i>IL-6</i>                       | AGGAGTGGCTAAGGACCAAGA       | GACCACAGTGAGGAATGTCCA       |
| <i>IL-10</i>                      | TGGGTGAGAAGCTGAAGACCCT      | CCTGCTCCACTGCCTTGCTC        |
| <i>RORC</i>                       | CCGCTGAGAGGGCTTCAC          | TGCAGGAGTAGGCCACATTACA      |
| <i>HIF-1<math>\alpha</math></i>   | AGCTTCTGTTATGAGGCTCACC      | TGACTTGATGTTTCATCGTCCTC     |
| <i>BTNL2</i>                      | ATTACCCTGCAGTCCACGTG        | CCACCCATCAGACGTACACC        |
