# Supplementary material
Source: PubMed Central journal article supplement (PMC9986825)
Supplement: EMBR-24-e56034-s012.pdf [file EMBR-24-e56034-s012.pdf]

## Expanded View Figures

**Figure EV1. Analysis of BTNL2 expression in mouse colonic epithelial cells and immune cells.**

Colonic epithelium cells were scraped with a razor blade, and CD45<sup>+</sup> cells from LPLs were sorted by FACS. Cells were lysed, and BTNL2 protein level was analyzed by immunoblot.

Source data are available online for this figure.

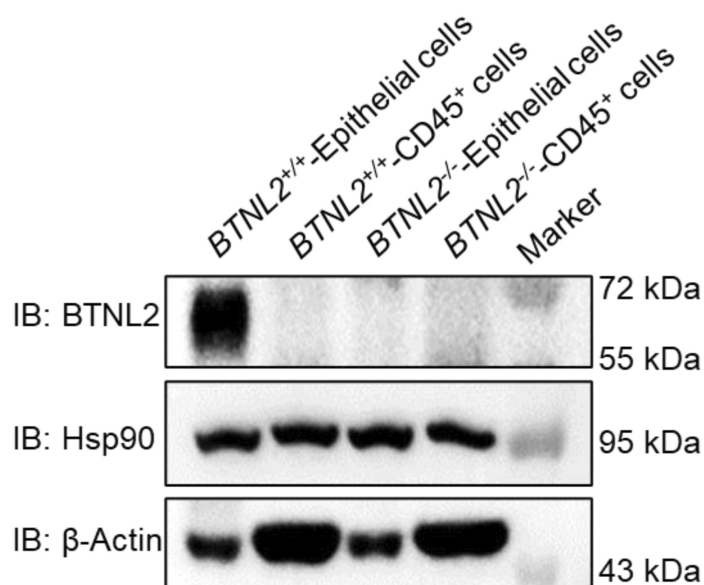

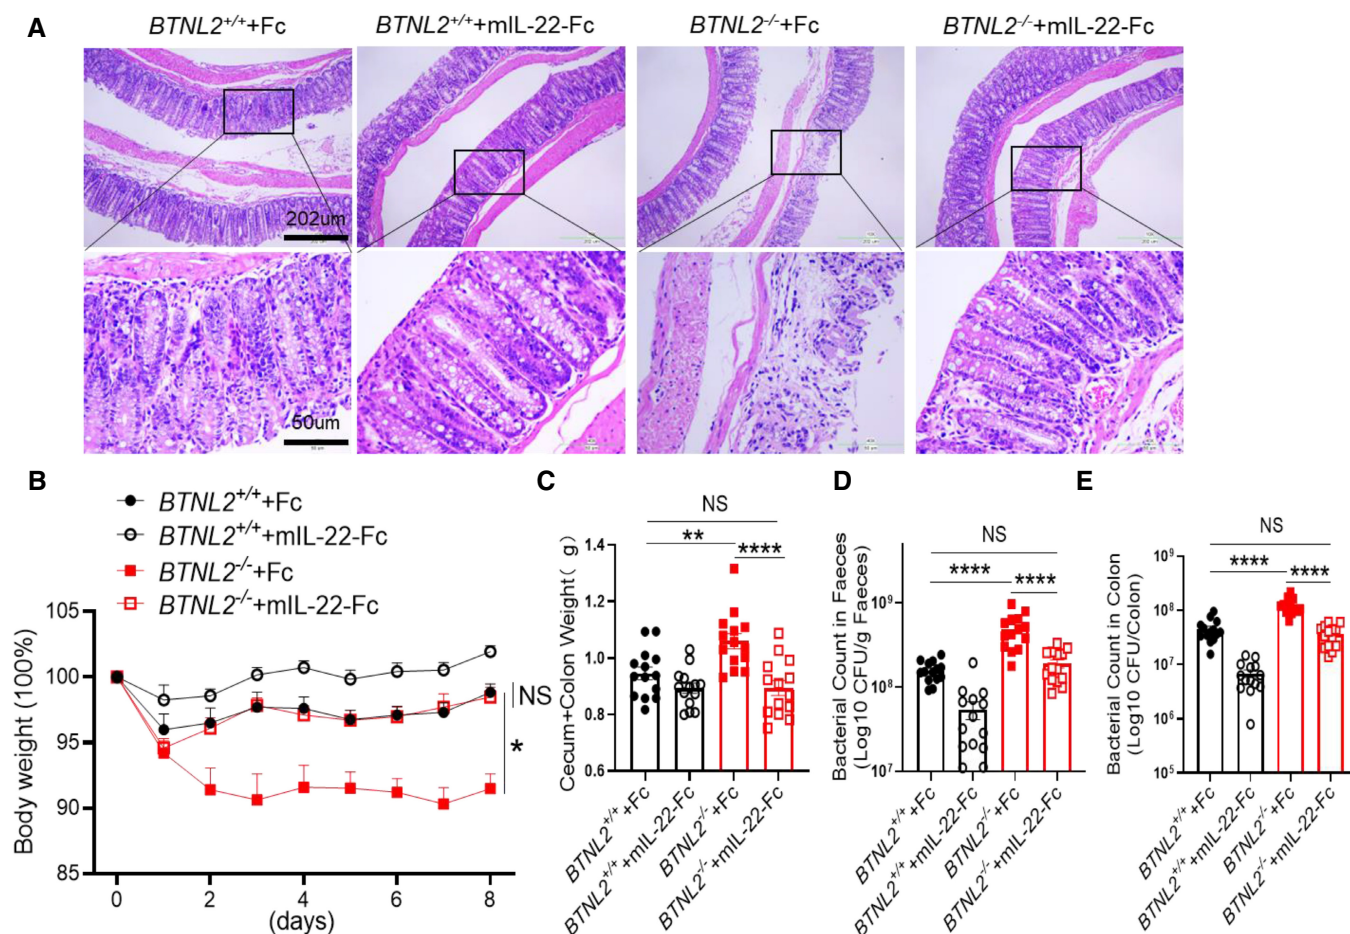

**Figure EV2. mIL-22-Fc recombinant protein reversed the defective phenotype of BTNL2 KO mice against *C. rodentium* infection.**

A, B Representative H&E images (A) and body weight changes (B) in wild-type control mice or BTNL2-KO mice treated with Fc or mIL-22-Fc (ip. 5 µg/mouse) at day 0, 2, 4, and 6 during *C. rodentium* infection were shown ( $n = 14$ ).

C–E Weight of cecum and colon (C) and bacterial titers in homogenates of fecal (D) or colon (E) from mice in (A) at day 9 after infection were shown ( $n = 14$ ).

Data information: All data are mean  $\pm$  s.e.m. NS, not significant. \* $P < 0.05$ , \*\* $P < 0.01$ , \*\*\*\* $P < 0.0001$  based on two-way ANOVA for (B) and one-way ANOVA for (C–E). Each dot represents one repetition,  $n = 14$ . Data are representative of three independent biological replicates.

Source data are available online for this figure.

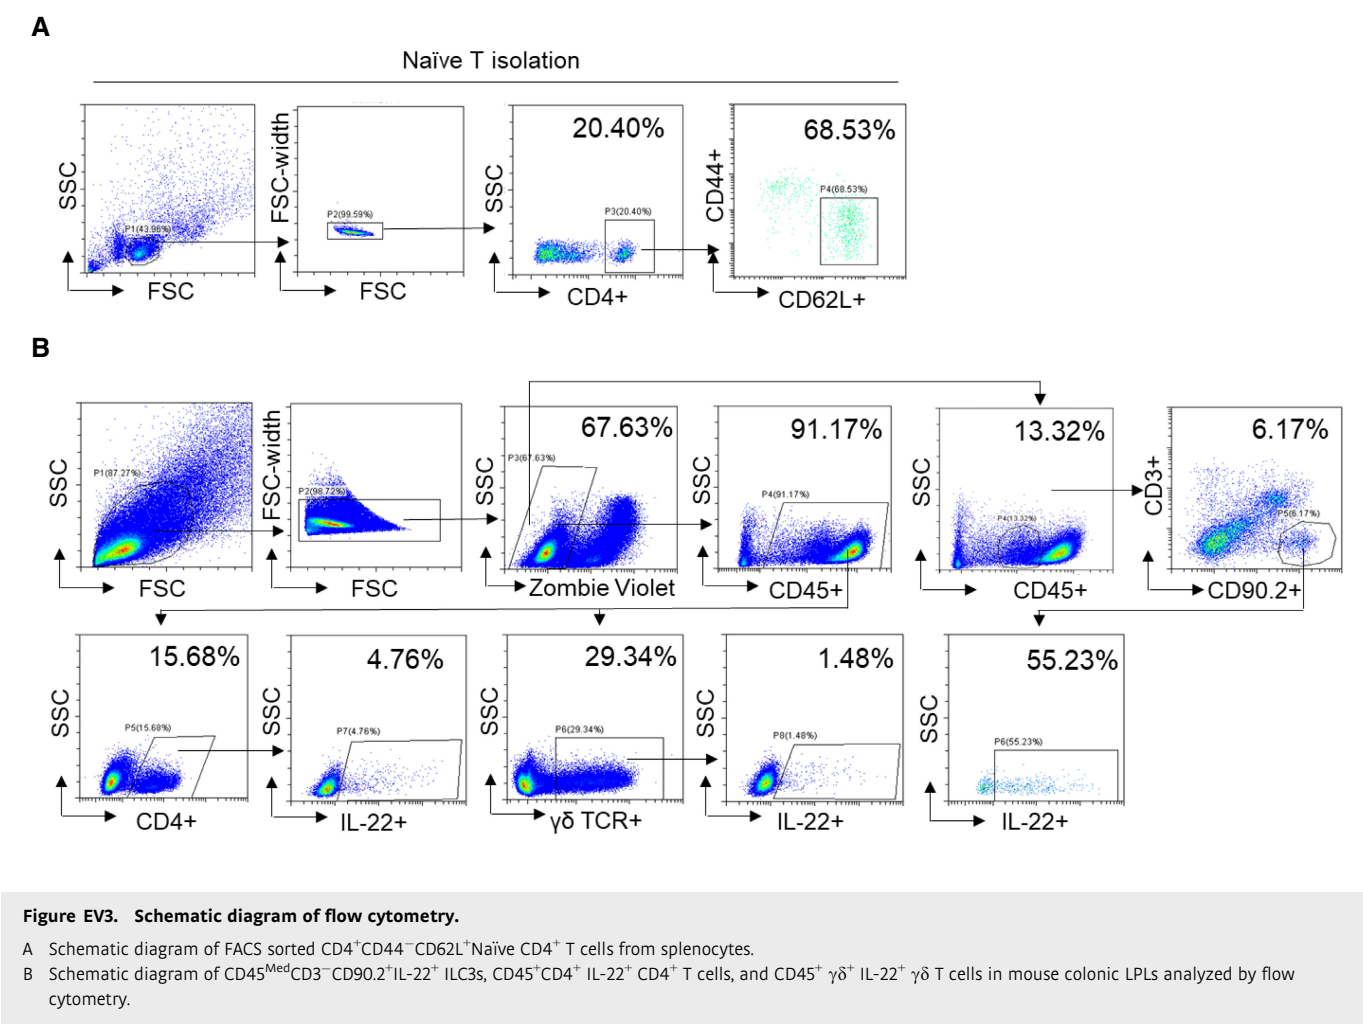

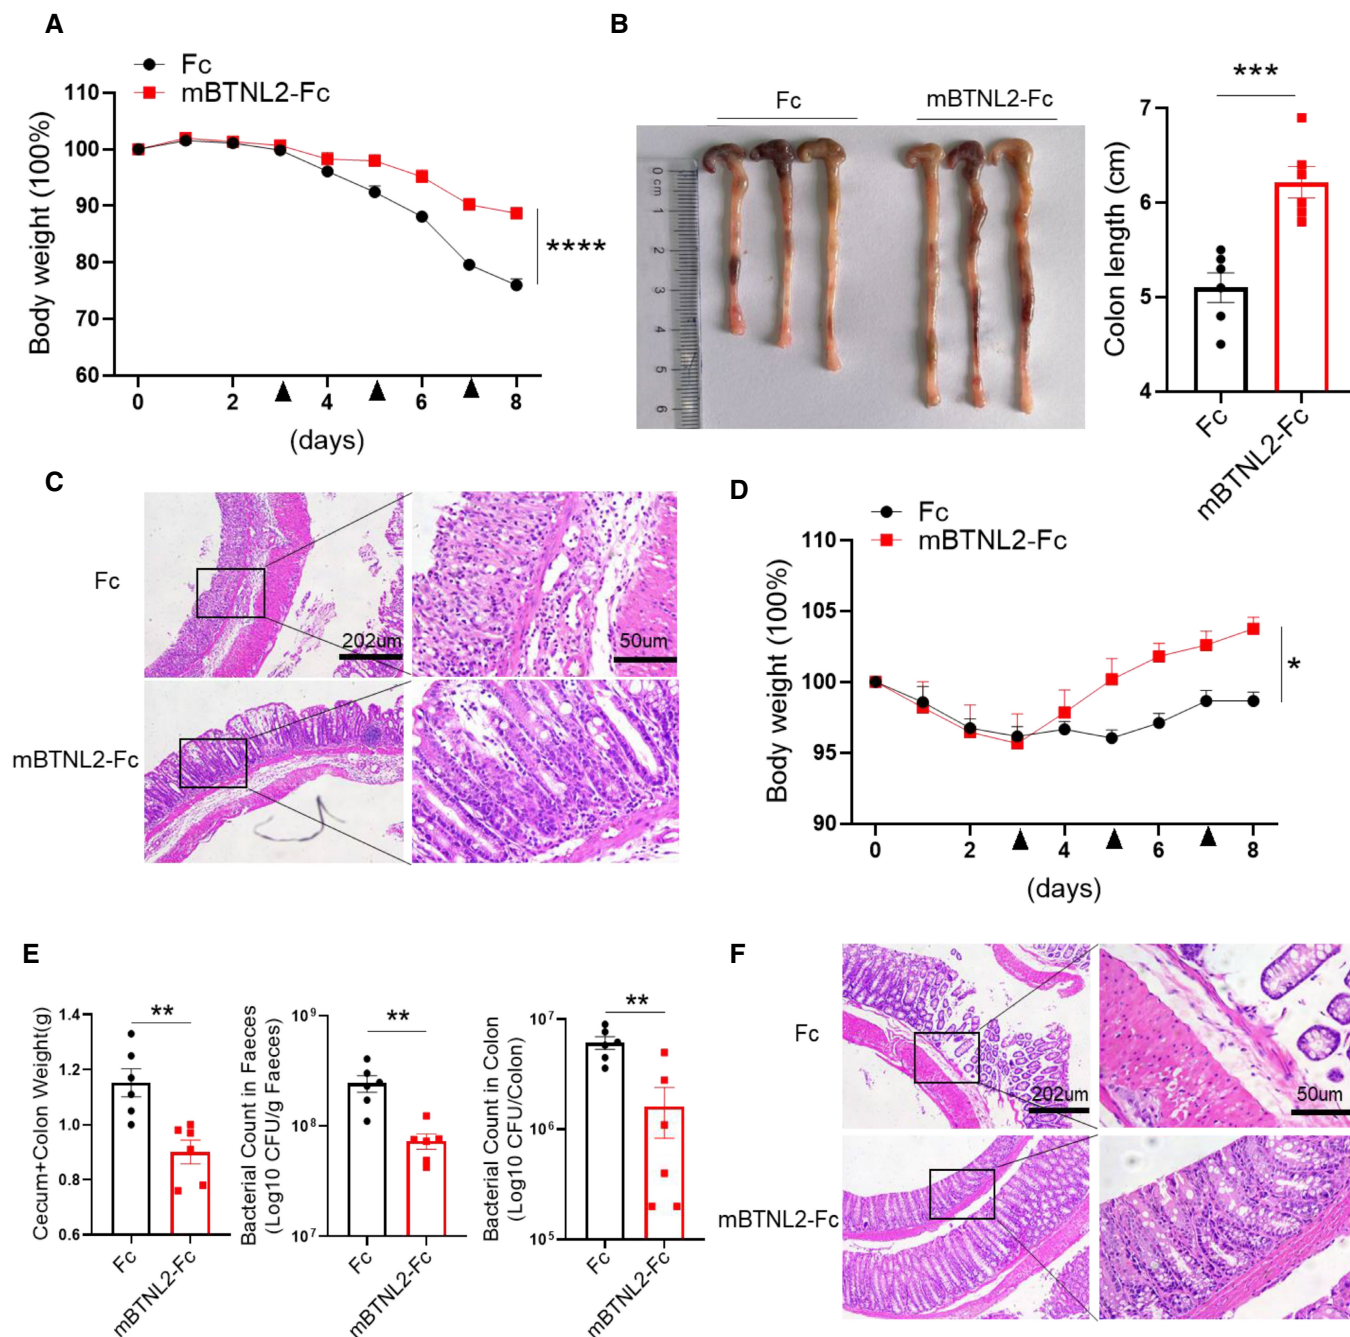

**Figure EV4. BTNL2 has a protective role in mice colitis and *C. rodentium* infection after disease's onset.**

A–C Body weight changes (A), representative colon image (left) and colon length (right) (B), and representative histological images (C) of wild-type mice treated with Fc or mBTNL2-Fc (ip. 50 µg/mouse) at day 3, 5, and 7 during DSS treatment were shown ( $n = 6$ ).

D Body weight changes in wild-type mice treated with Fc or mBTNL2-Fc (ip. 50 µg/mouse) at day 3, 5, and 7 during *C. rodentium* infection were shown ( $n = 6$ ).

E, F Weight of cecum and colon, bacterial titers in homogenates of fecal or colon (E) and representative histological images (F) from mice in (D) at day 9 after infection were shown ( $n = 6$ ).

Data information: All data are mean  $\pm$  s.e.m. NS, not significant. \* $P < 0.05$ , \*\* $P < 0.01$ , \*\*\* $P < 0.001$ , \*\*\*\* $P < 0.0001$  based on two-way ANOVA for (A, D) and two-tailed Student's *t*-test for (B, E). Each dot represents one repetition,  $n = 6$ .

Source data are available online for this figure.

**Figure EV5. Anti-BTNL2 mAb aggravates DSS-induced colitis in mice.**

- A–C Body weight changes (A), representative colon image (left) and colon length (right) (B), and representative histological images (C) of wild-type mice treated with Isotype rat IgG1 control Ab or anti-BTNL2 mAb (ip. 200  $\mu$ g/mouse) at day 0, 2, 4, and 6 during DSS treatment were shown ( $n = 6$ ). Data information: All data are mean  $\pm$  s.e.m.  $**P < 0.01$ ,  $***P < 0.001$  based on two-way ANOVA for (A) and two-tailed Student's  $t$ -test for (B). Each dot represents one repetition,  $n = 6$ .
- D Summary schematic. BTLN2 acts on Group 3 innate lymphoid cells (ILC3s), CD4<sup>+</sup> T cells, and  $\gamma\delta$  T cells in the gut to produce IL-22 through JAK-STAT3-HIF-1 $\alpha$ /RORC pathway, and a monoclonal antibody blocking BTLN2 attenuates colorectal tumorigenesis in mice by attenuating IL-22 production in the gut.

Source data are available online for this figure.

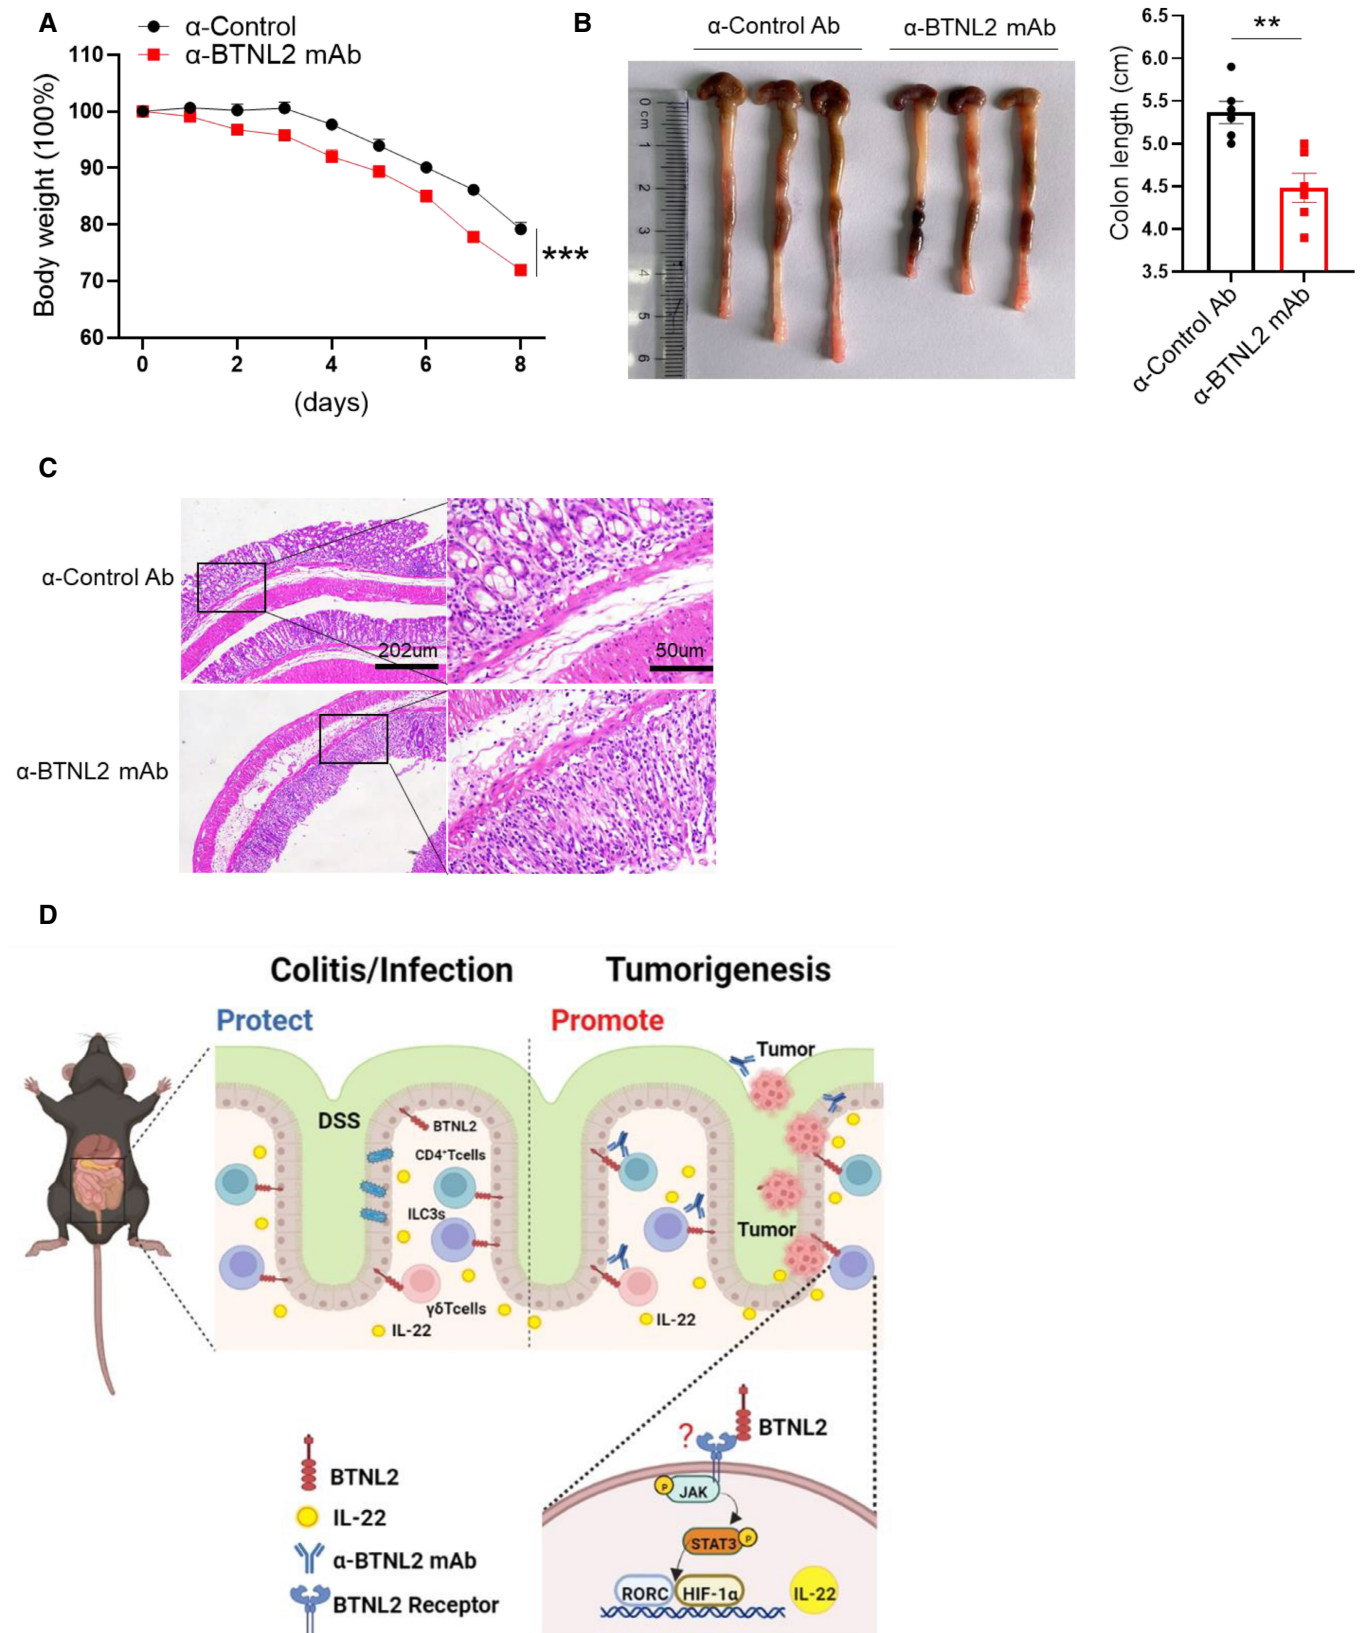

Figure EV5.
